# Supplementary material for: A CRISPR-Cas9 delivery system for in vivo screening of genes in the immune system
Source: PubMed Central journal article supplement (PMC6458184; doi:10.1038/s41467-019-09656-2), 2019-04-10
Supplement: 41467_2019_9656_MOESM1_ESM.pdf [file 41467_2019_9656_MOESM1_ESM.pdf]

A CRISPR-Cas9 delivery system for *in vivo* screening of genes in the immune system

LaFleur et al.

**a** LSK gating from bone marrow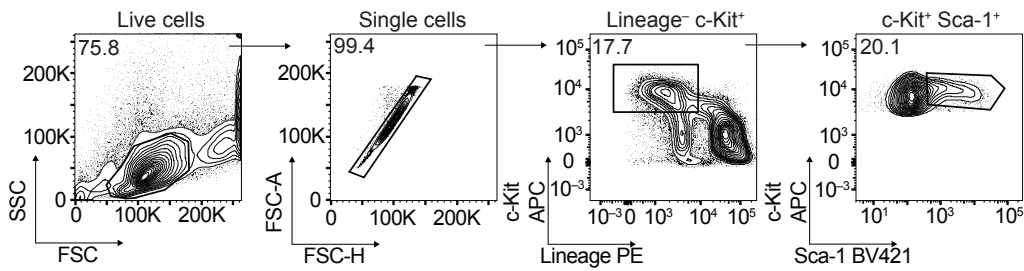**b** B cell gating from spleen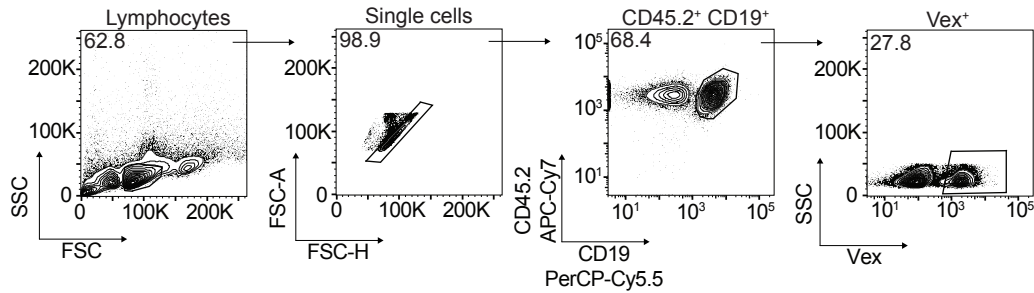**c** Red pulp macrophage gating from spleen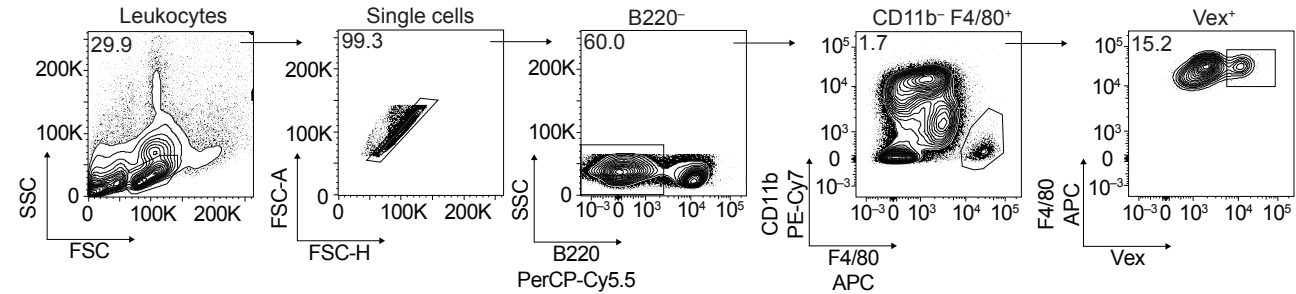**d** Cross-presenting dendritic cell gating from spleen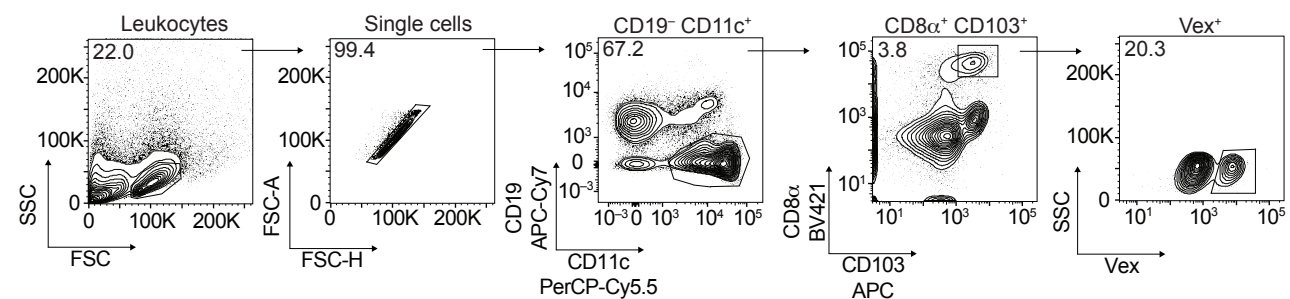**e**

## Blood

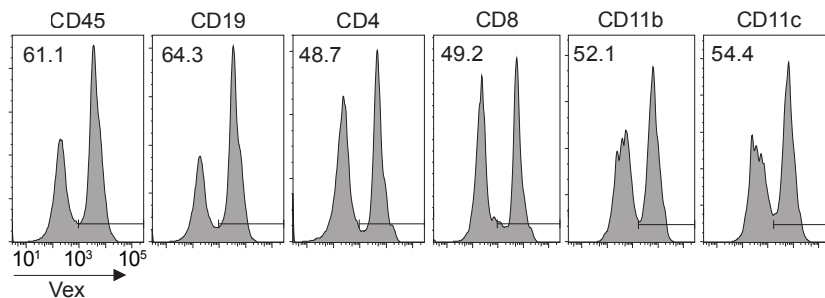**Supplementary Figure 1: Transduced immune cells are robustly recovered in CHIME-generated chimeras**

(a) Representative flow cytometry plots for sorting of LSK cells (used for all chimera experiments). (b) Representative flow cytometry plots for gating of Vex<sup>+</sup> CD19<sup>+</sup> B cells for Figure 1b, Figure 1d, and Supplementary Figure 3d. (c) Representative flow cytometry plots for gating of Vex<sup>+</sup> red-pulp macrophages for Figure 1b. (d) Representative flow cytometry plots for gating of Vex<sup>+</sup> cross-presenting dendritic cells for Figure 1b. (e) Representative flow cytometry plots of Vex expression on major immune lineages in mice transduced with a non-targeting control sgRNA. All experiments had at least four biological replicate animals per group and are representative of two independent experiments.

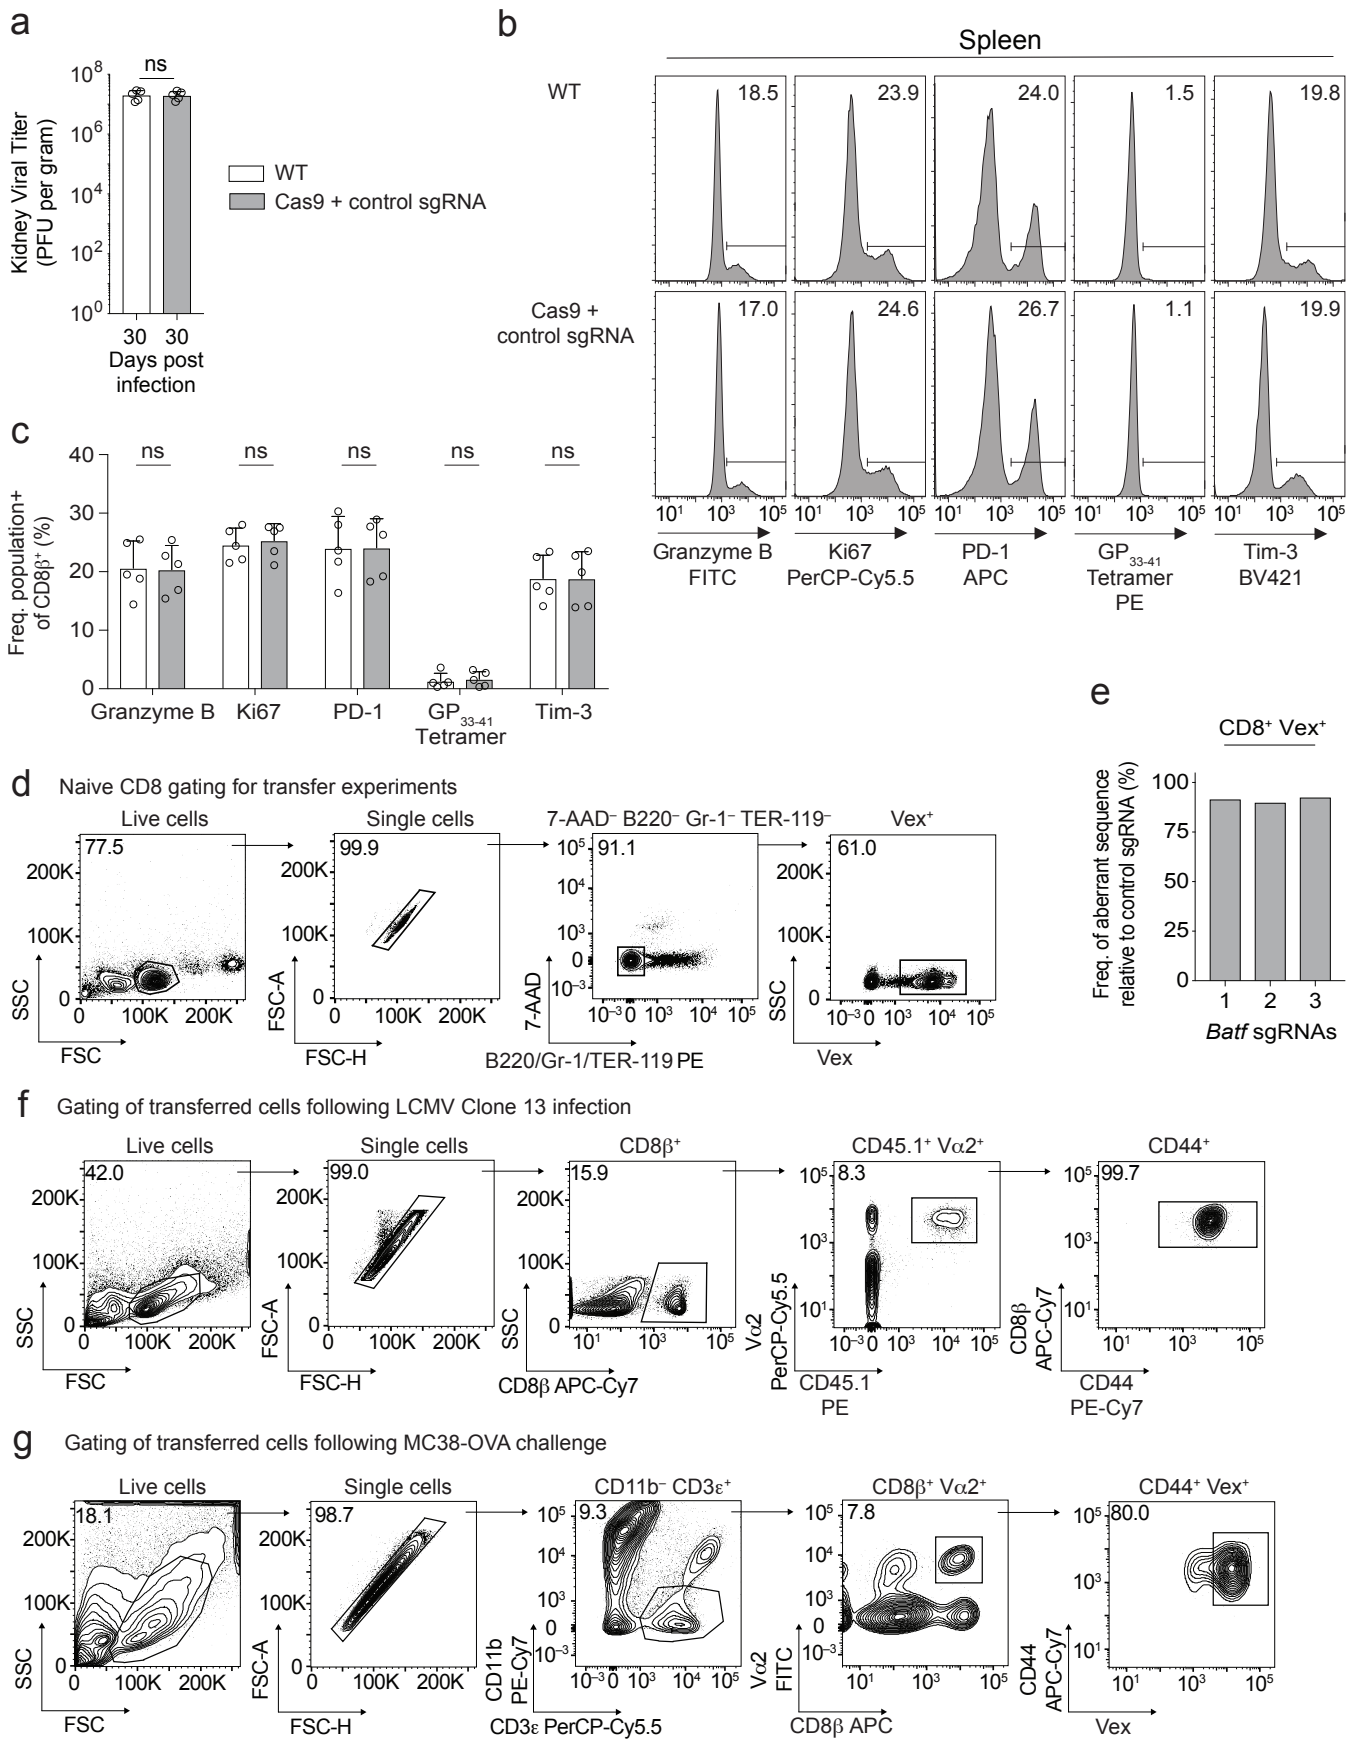

**Supplementary Figure 2: CHIME enables the analysis of CD8<sup>+</sup> T cell immune responses in disease models**

(a) Day 30 kidney viral titer following LCMV Clone 13 infection of WT or Cas9 + sgRNA chimeras. (b) Representative flow cytometry plots of Granzyme B, Ki67, PD-1, GP<sub>33-41</sub> tetramer, and Tim-3 expression on CD8<sup>+</sup> T cells at day 30 post LCMV Clone 13 infection. (c) Quantification of (b). (d) Representative flow cytometry plots for gating of Vex<sup>+</sup> naive CD8<sup>+</sup> T cells for transfer experiments for Figure 1d, Figures 2b-i, and transfer experiments in Figures 3-5. (e) TIDE assay on naïve CD8<sup>+</sup> T cells containing *Battf* sgRNAs prior to transfer into the competitive assay. (f) Gating strategy for analyzing transferred CD8<sup>+</sup> T cells from the spleen following LCMV Clone 13 infection for Figures 3b-c, Figures 4b-h, Supplementary Figures 3h-j, and Figure 5. (g) Gating strategy for analyzing transferred CD8<sup>+</sup> T cells from the tumor following tumor challenge for Figures 3d and 3e. All experiments had five biological replicate animals per group and are representative of two independent experiments. Bar graphs represent mean and error bars represent standard deviation. Statistical significance was assessed among the replicate bone marrow chimeras by two-sided unpaired t-test (a), or one-way ANOVA (c) (ns p>.05, \* p<.05, \*\* p<.01, \*\*\* p<.001, \*\*\*\* p<.0001). Source data are provided as a source data file.

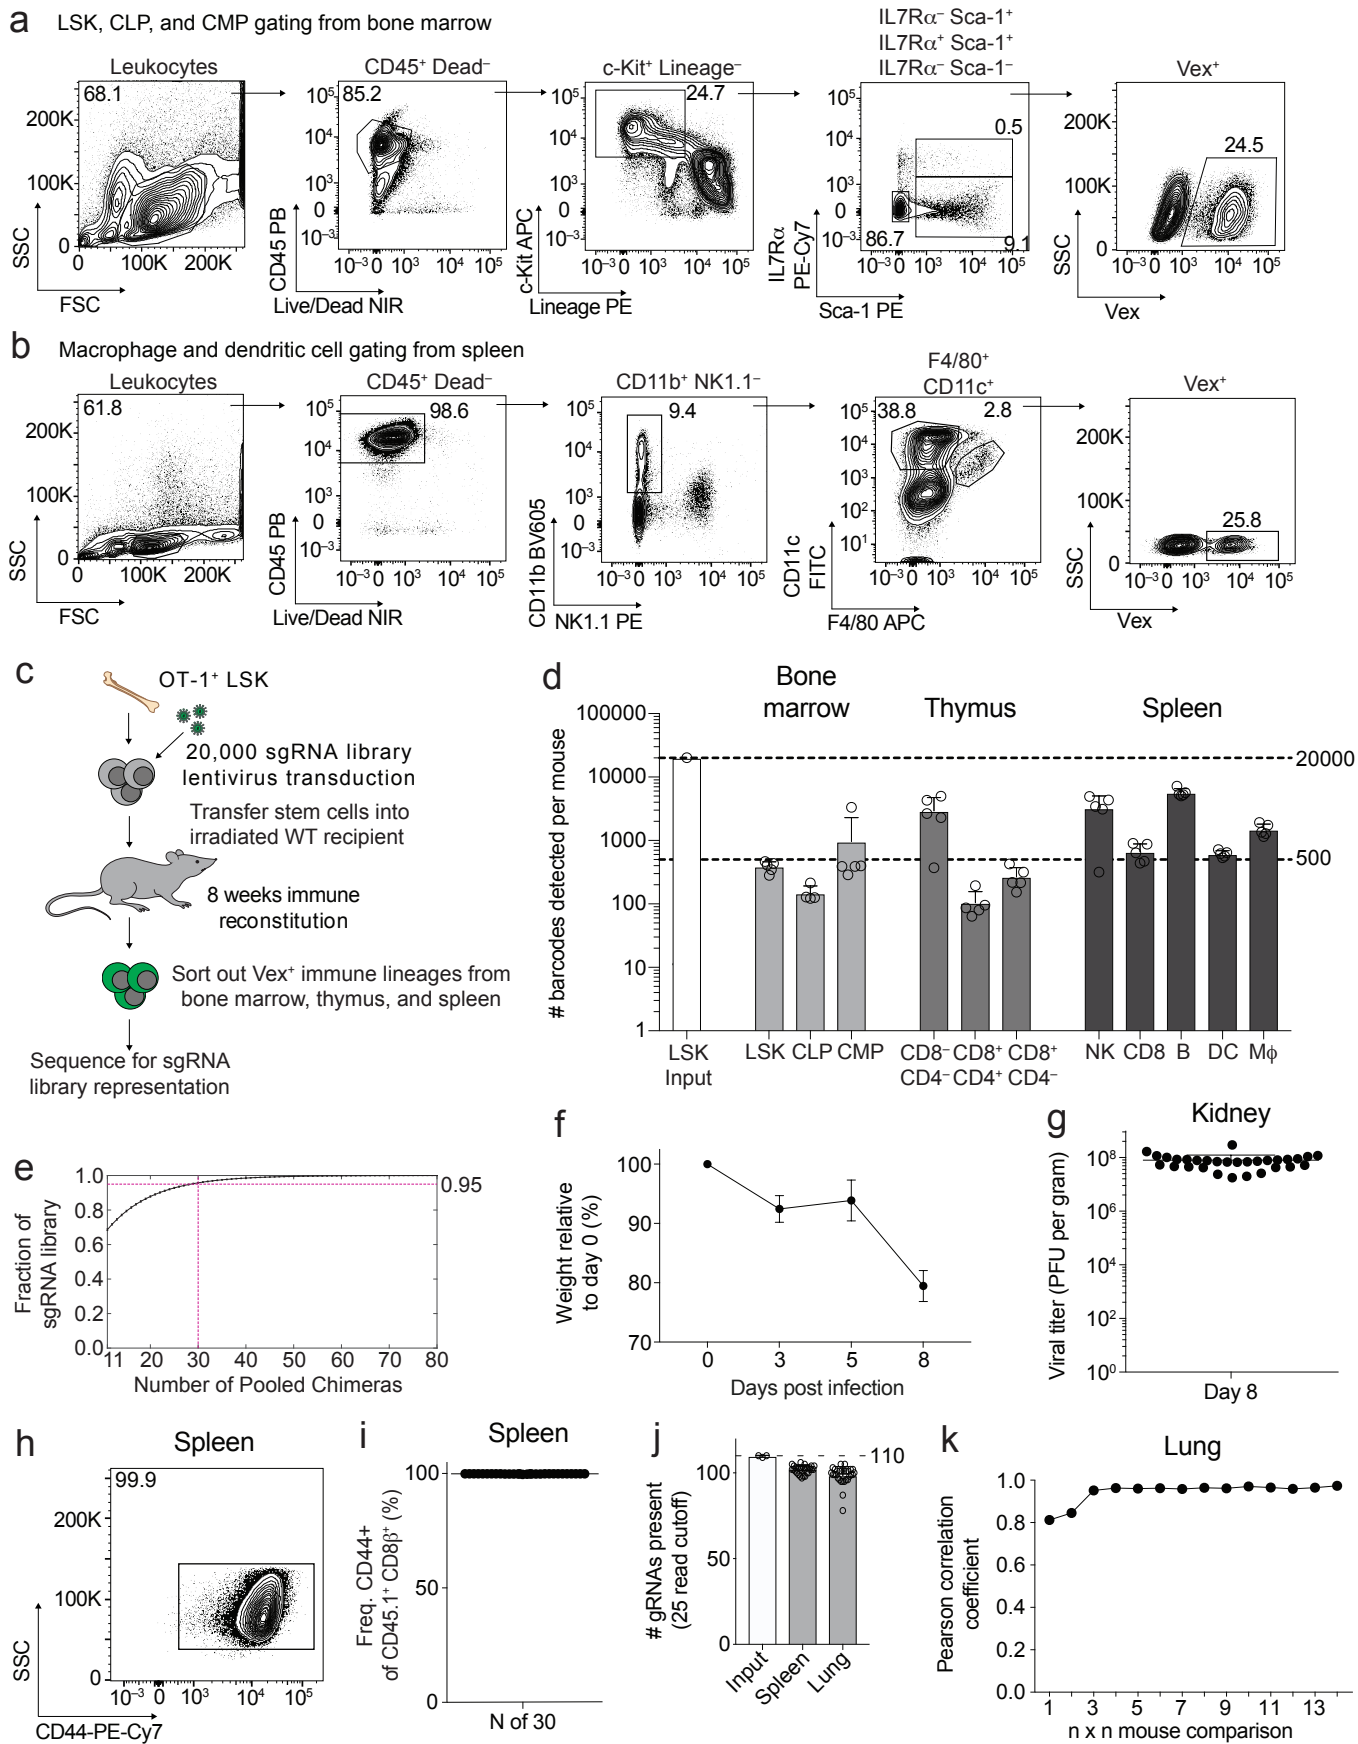

**Supplementary Figure 3: Bandwidth experiments increase the potential scale of *in vivo* CHIME screening**

(a) Representative flow cytometry plots for gating of Vex<sup>+</sup> bone marrow subsets for Supplementary Figure 3d. (b) Representative flow cytometry plots for gating of Vex<sup>+</sup> macrophages and dendritic cells from the spleen for Supplementary Figure 3d. (c) Quantification of detected barcodes per mouse in the different immune populations analyzed using a 25 read cutoff. (e) Plot of Monte Carlo simulation results following pooling of 11-80 chimeras to recover a 5000 sgRNA library. Magenta dotted lines depict 30 chimeras (x-axis) and 0.95 (y-axis). (f) Weight loss of animals from LCMV Clone 13 screen normalized to day 0. (g) Kidney viral titer of animals from LCMV Clone 13 screen normalized to kidney weight. (h) Representative flow cytometry plots analyzing CD44 expression on CD45.1<sup>+</sup> CD8<sup>+</sup> T cells from the spleen of mice from LCMV Clone 13 screen. (i) Quantification of (h). (j) Quantification of sgRNAs detected with 25 read cutoff from experiment in LCMV Clone 13 screen. (k) Plot of Pearson R correlation vs. the number of replicate mice analyzed in the lung from mice used in experiment in LCMV Clone 13 screen. The bandwidth experiment had five biological replicate animals per group and is representative of one experiment. The *in vivo* screen had thirty biological replicate animals per group and is representative of one experiment. Bar graphs represent mean and error bars represent standard deviation. Source data are provided as a source data file.

Supplementary Table 1: STARS analysis of *in vivo* screen. Related to Figures 4d-h

| Spleen Enriched |                         |                        |                                                                   |                            |             |               |          |          |
|-----------------|-------------------------|------------------------|-------------------------------------------------------------------|----------------------------|-------------|---------------|----------|----------|
| Gene Symbol     | Number of perturbations | Ranks of perturbations | Perturbations                                                     | Most enriched perturbation | STARS Score | Average Score | p-value  | FDR      |
| <i>Pdcd1</i>    | 4                       | 1,2;12,27              | GCAATACAGGGATAC;GACACACGGCGCAAT;GCAGCTTGTCACACT;GCACCCCAAGGCCAAA  | 2                          | 2.718512    | 2.23615       | 0.003794 | 0.075873 |
| <i>Kdr</i>      | 4                       | 6,10;11;63             | GATACGTTTGAAGAC;GTTACCCGCTTAAAG;GTCCGGACTTGACTGC;GTTGTAAGAAATGGA  | 3                          | 2.443697    | 1.383396      | 0.006477 | 0.06477  |
| <i>Adora2a</i>  | 4                       | 4,7;23;38              | GGAGAGCCCAACCCCT;GTGTCGATGGCAATA;GTTCCACAAAGACT;GAAGCAGTTGATGAT   | 1                          | 1.846436    | 1.485582      | 0.030627 | 0.204179 |
| <i>Ptpn2</i>    | 4                       | 9,16;41;44             | GCACCTCTATGAGGAT;GAATATGAGAAGTA;GAAGAAGTTACACT;GTCCAGTGATCCATT    | 4                          | 1.59176     | 1.026825      | 0.058108 | 0.290539 |
| <i>Olfr5</i>    | 3                       | 21,22;65               | GTGGGTCAACAAG;GTACACTCCCACTA;GACATGACAGGTTGA                      | 2                          | 1.017729    | 0.709741      | 0.211659 | 0.846634 |
| <i>Dgkz</i>     | 4                       | 20,37;42;95            | GCAAAGTCTTTGATCT;GACCCAGTGGTGTCT;GAGCACAATCCGAGTA;GATCGAGCCACTGAC | 3                          | 0.861254    | 0.595126      | 0.297432 | 0.991441 |
| <i>Rnfr128</i>  | 4                       | 38,39;43;70            | GCAAATACACCAAGA;GATAATTACGGCAGC;GGCAACCAAGCAGAT;GTCCAAATGGTCATC   | 3                          | 0.837031    | 0.631124      | 0.30997  | 0.885628 |
| <i>Socs3</i>    | 4                       | 3,31;46;77             | CGCGATAAAGAAAGT;GTGAGCGTCAAGACC;GACCTCGGACGAGGG;GTTGAGTACACAGTC   | 3                          | 0.769057    | 0.749086      | 0.357992 | 0.89498  |
| <i>Havcr2</i>   | 4                       | 30,33;100;104          | GCTAAAGGGGATCT;GTTACACTCTATCTA;GATCAGTCTGAGCA;GTTCCCAAGAACC       | 2                          | 0.57741     | 0.477265      | 0.571964 | 1        |
| <i>Cpt1a</i>    | 4                       | 55,59;75;79            | GCACATTTGCTGTA;GACGTTGGACGAATC;GCATACTGCTGTATC;GAGGAATACATCTAC    | 4                          | 0.575062    | 0.500489      | 0.578395 | 1        |
| <i>Prkab2</i>   | 4                       | 13,73;83;94            | GTACAACTCTTTGT;GTCCTCACCTTTA;GAGGAGCACAAGATC;GTTCCAGCACGGCGA      | 2                          | 0.52437     | 0.506811      | 0.672218 | 1        |
| <i>Lag3</i>     | 4                       | 15,72;86;102           | GGGTGCGGGTGTCT;GTCACGACGCTACAC;GATCCCTAACCTTCTA;GAGGAAGTCCCGCC    | 2                          | 0.513187    | 0.483718      | 0.691696 | 1        |
| <i>Hk2</i>      | 4                       | 49,69;71;89            | GGAGATCGTACAT;GAAGGCACTAGCC;GATCCGAGTGGAC;GATTCCTCCGAGACAT        | 2                          | 0.484154    | 0.473383      | 0.754569 | 1        |
| <i>Il1r1</i>    | 4                       | 19,64;78;87            | GCAGCAAGACCCCA;GCCTATGCTCTATC;GAGCATACAATTTGA;GACTGTGTTAGAGAA     | 2                          | 0.449544    | 0.413085      | 0.852972 | 1        |
| <i>Tnfrsf9</i>  | 4                       | 28,58;68;85            | GTTCCTCCTACCC;GCCAAGTACTTCT;GTGCATACGACTTC;GACCAAGGCTGACAGT       | 3                          | 0.442735    | 0.415401      | 0.871108 | 1        |
| <i>Entpd1</i>   | 4                       | 60,62;80;94            | GAGCTATCACAGCA;GCTTGGATGTTGGTA;GCCAACCTGTACATC;GTCCGATGAAGTCTATC  | 2                          | 0.440154    | 0.501908      | 0.885728 | 1        |
| <i>Tnfrsf1a</i> | 4                       | 32,50;82;99            | GGATCCCGTCCCTGT;GAGTTGCAAGCATG;GATGGGATACATCC;GAGACCTAGCAAGAT     | 2                          | 0.433177    | 0.396722      | 0.916216 | 1        |
| <i>Ingr1</i>    | 4                       | 18,51;81;106           | GTATGGAGACATAA;GTTCCAGGTGAAATA;GTTATCCCAAGCATA;GTATACCAATACGCA    | 2                          | 0.430575    | 0.407703      | 0.930049 | 1        |
| <i>Tigit</i>    | 4                       | 40,53;74;107           | GAGCCATGTTCTCT;GTCCTGACAAATGAA;GCAGGCACGATAGAT;GCCATATCATCGTAT    | 2                          | 0.427118    | 0.417596      | 0.956604 | 1        |
| <i>Olfr8</i>    | 3                       | 24,67;88               | GAAGTACATGGGTGT;GATGTAGGATGCTAA;GTACAAATGATTCATTA                 | 2                          | 0.361439    | 0.379644      | 0.990423 | 0.990423 |
| Spleen Depleted |                         |                        |                                                                   |                            |             |               |          |          |
| Gene Symbol     | Number of perturbations | Ranks of perturbations | Perturbations                                                     | Most enriched perturbation | STARS Score | Average Score | p-value  | FDR      |
| <i>Zap70</i>    | 4                       | 1,2;3;20               | GTCTGGCGGTACCA;GGAGATCCCTGTGAG;GTGCACAAACCCTAC;GAAGCGAGAGAATCT    | 3                          | 4.102763    | 2.808489      | 4.63E-05 | 0.000879 |
| <i>Cd28</i>     | 4                       | 6,8;18;21              | GTCCGCAATTCGAGCG;GCTTGTGGTAGATAG;GTTCCACAAACCCTC;GAAAGGGCGTGAACA  | 4                          | 2.876694    | 1.752224      | 0.002082 | 0.019778 |
| <i>Dlat</i>     | 4                       | 10,13;14;64            | GACTACCGCCAACGGA;GCGCAAGGGCCACCA;GCAGGCTCTCAAAAC;GTTCCAGAACACACC  | 3                          | 2.142855    | 1.208302      | 0.014573 | 0.092297 |
| <i>Entpd1</i>   | 4                       | 27,31;49;51            | GTGGATGAAGTCACT;GCCAACCTGTACATC;GCTTGGATGTTGTA;GAGCATCACAGCCA     | 4                          | 1.33529     | 0.756809      | 0.103817 | 0.49313  |
| <i>Havcr2</i>   | 4                       | 7,11;78;81             | GTTCCTCAAGAACCC;GATCAGTCTGAGCA;GTACACTCTATCTA;GCTAAAGGGCGATCT     | 2                          | 1.313364    | 0.726743      | 0.11034  | 0.419292 |
| <i>Cpt1a</i>    | 4                       | 32,36;52;56            | GAGGAATACACTATC;GCATACCTGTATC;GACGTGGACGAATC;GAGCATGCTGCTGTA      | 4                          | 1.172289    | 0.68583       | 0.15059  | 0.476868 |
| <i>Hk2</i>      | 4                       | 22,40;42;62            | GATTCGCGAGGACAT;GATCCGAGTGGAC;GAAGGCCATCCAGCG;GGAGATGCGTCAAT      | 4                          | 0.996004    | 0.6845        | 0.217164 | 0.589445 |
| <i>Prkab2</i>   | 4                       | 17,28;38;98            | GTTCAGACCAGCGGA;GAGGAGCACAAGATC;GTCCTCACCTTTA;GTACAAACTCTTTGT     | 3                          | 0.966827    | 0.686639      | 0.237474 | 0.564001 |
| <i>Lag3</i>     | 4                       | 9,25;39;96             | GAGAGAAGTCCCGC;GATCCTAACCTTCTA;GTACAGCAGGTACAC;GGGTGCGGGTGTCT     | 3                          | 0.930959    | 0.756021      | 0.256072 | 0.540597 |
| <i>Tigit</i>    | 4                       | 4,37;58;71             | GTCCTATACATGAT;GCAGGCACGATAGAT;GTCCTGACAAATGAA;GAGCATACTGCTCTC    | 4                          | 0.760337    | 0.681916      | 0.365348 | 0.694161 |
| <i>Il1r1</i>    | 4                       | 24,33;47;92            | GACTGTGTTAGAGAA;GAGCATAACAATGTA;GGCTATGCTCTATC;GCAGCAAGACCCCA     | 3                          | 0.747877    | 0.568364      | 0.377469 | 0.651993 |
| <i>Rnfr128</i>  | 4                       | 41,68;72;75            | GTCACAAATGGTCACT;GGGCAACCCAGCAGT;GATAAATACGGCAGC;GCCAATACACCAAGA  | 4                          | 0.665326    | 0.496785      | 0.457599 | 0.724532 |
| <i>Tnfrsf1a</i> | 4                       | 12,29;61;79            | GAGACCTAGCAAGAT;GATGGGATACATCC;GAGTTGCAAGCATG;GGATCCCGTCCGCTG     | 2                          | 0.645653    | 0.562173      | 0.476752 | 0.696792 |
| <i>Tnfrsf9</i>  | 4                       | 28,43;53;83            | GACCAGGCTGACAGT;GTGCACTGACTCTC;GCCAAGTACTCTCT;GTCCTCTCTACCC       | 3                          | 0.634808    | 0.492947      | 0.488318 | 0.662718 |
| <i>Ingr1</i>    | 4                       | 5,30;60;93             | GTATACCAATACGCA;GGTATTTCCAGATG;GTTCCAGGTGAAATA;GTATGTGGAGACATAA   | 2                          | 0.626997    | 0.652686      | 0.501457 | 0.635179 |
| <i>Olfr8</i>    | 3                       | 23,44;87               | GTACAAAGATTCATTA;GTATAGGATGCTAA;GAAGTACATGGGTGT                   | 2                          | 0.540608    | 0.473449      | 0.630303 | 0.748485 |
| <i>Ptpn2</i>    | 4                       | 67,70;95;102           | GTGCAAGTACCTT;GAAGAAGTACATCT;GAATATGAGAAGTA;GCACCTATGAGGAT        | 2                          | 0.493103    | 0.665067      | 0.73796  | 0.824779 |
| <i>Dgkz</i>     | 4                       | 16,69;74;91            | GTGGAGCCACTGAC;GAGCACAATCCGAGTA;GACCCAGTGGTGTCT;GCAGTCTTTGATCT    | 2                          | 0.484154    | 0.441225      | 0.754569 | 0.796489 |
| <i>Socs3</i>    | 4                       | 34,65;80;108           | GTTGAGTACACAGTC;GACTTCGGACGAGGG;GTGAGCGTCAAGACC;GCGGATAAAGAAAGT   | 2                          | 0.455168    | 0.407293      | 0.833449 | 0.833449 |
| Lung Enriched   |                         |                        |                                                                   |                            |             |               |          |          |
| Gene Symbol     | Number of perturbations | Ranks of perturbations | Perturbations                                                     | Most enriched perturbation | STARS Score | Average Score | p-value  | FDR      |
| <i>Pdcd1</i>    | 4                       | 1,2;11;18              | GACACACGGCGCAAT;GCAATACAGGGATAC;GCACCCCAAGGCCAAA;GCAGCTTGTCACACT  | 4                          | 3.144481    | 2.43948       | 0.001295 | 0.025908 |
| <i>Adora2a</i>  | 4                       | 3,4;26;41              | GTGTGATGGCAATA;GGAGAGCCCAACCCCT;GTTCCACAAAGACT;GAAGCAGTTGATGAT    | 2                          | 2.132688    | 1.559918      | 0.016794 | 0.167939 |
| <i>Kdr</i>      | 4                       | 7,12;19;55             | GATACGTTTGAAGAC;GTCGGACCTGACTGC;GTTACCCGCTTAAAG;GTTGTAAGAAATGGA   | 3                          | 1.768209    | 1.224709      | 0.039648 | 0.264323 |
| <i>Ptpn2</i>    | 4                       | 9,13;44;46             | GCACCTCTATGAGGAT;GAATATGAGAAGTA;GAAGAAGTTACACT;GTCCAGTGATCCATT    | 1                          | 1.514539    | 1.02761       | 0.068749 | 0.343743 |
| <i>Socs3</i>    | 4                       | 6,29;30;77             | CGCGATAAAGAAAGT;GACTTCGGACGAGGG;GTGAGCGTCAAGACC;GTTGAGTACACAGTC   | 3                          | 1.229057    | 0.807144      | 0.133796 | 0.535184 |
| <i>Rnfr128</i>  | 4                       | 37,38;42;66            | GCAAATACACCAAGA;GATAATTACGGCAGC;GGGCAACCCAGCAGT;GTCCAAATGGTCATC   | 4                          | 0.887395    | 0.666794      | 0.27592  | 0.919732 |
| <i>Dgkz</i>     | 4                       | 20,35;43;95            | GCAAAGTCTTTGATCT;GACCCAGTGGTGTCT;GAGCACAATCCGAGTA;GATGGAGCCACTGAC | 3                          | 0.870311    | 0.595315      | 0.30997  | 0.886628 |
| <i>Olfr5</i>    | 3                       | 28,34;74               | GTACACTACCCAGTA;GTGGGTCAACAAG;GACATGACAGGTTGA                     | 2                          | 0.703285    | 0.53068       | 0.416933 | 1        |
| <i>Cpt1a</i>    | 4                       | 60,68;73;79            | GCACATTTGCTGTA;GAGGAATACATCTAC;GCATACTGCTGTATC;GACCTTGGACGAATC    | 4                          | 0.575062    | 0.536189      | 0.578395 | 1        |
| <i>Entpd1</i>   | 4                       | 54,72;86;89            | GCTTGGATGTTGTA;GAGCTATCACAGCCA;GTGGATGAAGTCAATC;GCCAACCTGTACATC   | 2                          | 0.513187    | 0.54987       | 0.691696 | 1        |
| <i>Tnfrsf9</i>  | 4                       | 23,59;62;85            | GTTCCTCCTACCC;GCCAAGTACTTCTC;GTGCATACGACTTC;GACCAAGGCTGACAGT      | 3                          | 0.505994    | 0.439632      | 0.702429 | 1        |
| <i>Havcr2</i>   | 4                       | 27,39;49;99            | GCTAAAGGGGATCT;GTTACACTCTTCTA;GTTCCCAAGAACCC;GATCAGTCTGAGCA       | 2                          | 0.502274    | 0.438843      | 0.717511 | 1        |
| <i>Hk2</i>      | 4                       | 61,71;92;97            | GGAGATGCGTCAAT;GAAGGCCATCCAGCG;GATTCGCGAGGACAT;GATCCGGAGTTGACC    | 2                          | 0.502774    | 0.605183      | 0.717511 | 1        |
| <i>Prkab2</i>   | 4                       | 8,69;81;87             | GTACAAACTCTTTGT;GTCCTCACCTTTA;GAGGAGCACAAGATC;GTTCCAGCACGGCGA     | 2                          | 0.484154    | 0.498144      | 0.754569 | 1        |
| <i>Lag3</i>     | 4                       | 16,65;83;102           | GGGTGCGGGTGTCT;GTCACGACGCTACAC;GATCCCTAACCTTCTA;GAGAGAAGTCCCGCC   | 2                          | 0.455168    | 0.447587      | 0.833449 | 1        |
| <i>Il1r1</i>    | 4                       | 15,45;76;98            | GTATGGAGACATAA;GTTCCAGGTGAAATA;GGTATTCACAGCATA;GTATACCAATACGCA    | 2                          | 0.455168    | 0.433002      | 0.833449 | 1        |
| <i>Tnfrsf1a</i> | 4                       | 17,64;84;91            | GCAGCAAGACCCCA;GCCTATGCTCTATC;GAGCATACAATTTGA;GACTGTGTTAGAGAA     | 2                          | 0.449544    | 0.438578      | 0.852972 | 1        |
| <i>Entpd1</i>   | 4                       | 22,47;70;96            | GGATCCCGTCCCTGT;GAGTTGCAAGCATG;GATGGGATACATCC;GAGACCTAGCAAGAT     | 2                          | 0.444543    | 0.419446      | 0.866898 | 0.912524 |
| <i>Tigit</i>    | 4                       | 40,63;78;108           | GAGCCATGTTCTCT;GTCCTGACAAATGAA;GCAGGCACGATAGAT;GCCATATCATCGTAT    | 2                          | 0.444543    | 0.417592      | 0.866898 | 0.912524 |
| <i>Olfr8</i>    | 3                       | 25,57;80               | GAAGTACATGGGTGT;GATGTAGGATGCTAA;GTACAAATGATTCATTA                 | 3                          | 0.414908    | 0.405406      | 0.977377 | 0.977377 |
| Lung Depleted   |                         |                        |                                                                   |                            |             |               |          |          |
| Gene Symbol     | Number of perturbations | Ranks of perturbations | Perturbations                                                     | Most enriched perturbation | STARS Score | Average Score | p-value  | FDR      |
| <i>Zap70</i>    | 4                       | 1,2;4;10               | GTCTGGCGGTACCA;GGAGATCCCTGTGAG;GTGCACAAACCCTAC;GAAGCGAGAGAATCT    | 4                          | 4.165571    | 3.016835      | 4.63E-05 | 0.000925 |
| <i>Cd28</i>     | 4                       | 5,7;23;29              | GTCCGCAATTCGAGCG;GCTTGTGGTAGATAG;GTTCCACAAACCCTC;GAAAGGGCGTGAACA  | 4                          | 2.315979    | 1.581827      | 0.010502 | 0.10502  |
| <i>Dlat</i>     | 4                       | 6,8;18;75              | GCCACAGGGCCACCA;GACTACC GCAAGCGA;GCAGGCTCTCAAAAC;GTTCCAGAACACACC  | 3                          | 1.833905    | 1.199382      | 0.032339 | 0.215591 |
| <i>Hk2</i>      | 4                       | 14,19;40;50            | GATTCGAGTGGTGAAC;GATTCGAGGACAT;GAAGGCCATCCAGCG;GTTCCAGGCTACACAT   | 3                          | 1.396991    | 0.91608       | 0.097062 | 0.485311 |
| <i>Cpt1a</i>    | 4                       | 32,38;43;51            | GACGTGGACGAATC;GCATCTCTGTATC;GAGGAATACATCTAC;GCACATTGCTGTA        | 4                          | 1.33529     | 0.766896      | 0.103817 | 0.415267 |
| <i>Entpd1</i>   | 4                       | 22,25;39;57            | GCCAACTGTACATC;GTGGATGAAGTCAAT;GAGCTATCACAGCCA;GCTTGGATGTTGTA     | 4                          | 1.142071    | 0.800368      | 0.157391 | 0.524636 |
| <i>Havcr2</i>   | 4                       | 12,17;72;84            | GATCAGTCTGAGCA;GTTCCCAAGAACCC;GTTACACTCTATCTA;GCTAAAGGGCGATCT     | 2                          | 0.989556    | 0.637312      | 0.228082 | 0.651664 |
| <i>Prkab2</i>   | 4                       | 24,30;42;103           | GTTCAGACGAGCGA;GAGGAGCACAAGATC;GTCCTCACCTTTA;GTACAAACTCTTTGT      | 3                          | 0.861254    | 0.622685      | 0.297432 | 0.743581 |
| <i>Lag3</i>     | 4                       | 9,28;46;95             | GAGAGAAGTCCCGC;GATCCTAACCTTCTA;GTACAGCAGGATACAC;GGGTGCGGGTGTCT    | 3                          | 0.769057    | 0.676946      | 0.357992 | 0.795538 |
| <i>Tigit</i>    | 4                       | 3,33;48;71             | GCTTATCATCGTAT;GCAGGCACGATAGAT;GTCCTGACAAATGAA;GAGCATACTGTTCTCT   | 4                          | 0.760337    | 0.765895      | 0.365348 | 0.730696 |
| <i>Il1r1</i>    | 4                       | 20,27;47;94            | GACTGTGTTAGAGAA;GAGCATAACAATGTA;GGTATGCTCTATC;GCAGCAAGACCCCA      | 3                          | 0.747877    | 0.611389      | 0.377469 | 0.686308 |
| <i>Rnfr128</i>  | 4                       | 45,69;73;74            | GTACAAATGGTCACT;GGGCAACCCAGCAGT;GATAAATACGGCAGC;GCCAATACACCAAGA   | 4                          | 0.688644    | 0.512424      | 0.422669 | 0.704449 |
| <i>Tnfrsf9</i>  | 4                       | 26,49;52;88            | GACCAGGCTGACAGT;GTGCAATGCTACTC;GCCAAGTACTCTCT;GTTCCCTCTACCC       | 3                          | 0.652073    | 0.488007      | 0.463983 | 0.713821 |
| <i>Socs3</i>    | 4                       | 34,81;82;105           | GTTGAGTACACAGTC;GTGAGCCTGACAGCC;GATCTCGGACGAGGG;GCGGATAAAGAAAGT   | 2                          | 0.645653    | 0.470052      | 0.476752 | 0.681075 |
| <i>Ingr1</i>    | 4                       | 13,35;66;96            | GTATACCAATACGCA;GTAATTTCCAGCATA;GTTCCAGGTGAAATA;GTATGGAGACATAA    | 2                          | 0.549161    | 0.499946      | 0.624705 | 0.83294  |
| <i>Tnfrsf1a</i> | 4                       | 15,41;64;89            | GAGACCTAGCAAGAT;GATGGGATACATCC;GAGTTGCAAGCATG;GGATCCCGTCCGCTG     | 2                          | 0.484154    | 0.473538      | 0.754569 | 0.943211 |
| <i>Dgkz</i>     | 4                       | 16,68;76;91            | GTGGAGCCACTGAC;GAGCACAATCCGAGTA;GACCCAGTGGTGTCT;GCAGTCTTTGATCT    | 2                          | 0.475903    | 0.435167      | 0.777007 | 0.914126 |
| <i>Ptpn2</i>    | 4                       | 65,67;98;102           | GTGCAAGTACCTT;GAAGAAGTACATCT;GAATATGAGAAGTA;GCACCTATGAGGAT        | 2                          | 0.468333    | 0.629646      | 0.796669 | 0.885188 |
| <i>Olfr8</i>    | 3                       | 31,54;86               | GTACAAAGATTCATTA;GTATAGGATGCTAA;GAAGTACATGGGTGT                   | 2                          | 0.434081    | 0.397261      | 0.9034   | 0.950948 |
| <i>Olfr5</i>    | 3                       | 37,77;83               | GACATGACAGGTTGA;GTGGGTCAACAAG;GTACACTACCCAGTA                     | 2                          | 0.355561    | 0.353885      | 0.994078 | 0.994078 |

| Supplementary Table 2: sgRNA and TIDE primer sequences |                       |                         |                             |
|--------------------------------------------------------|-----------------------|-------------------------|-----------------------------|
| Gene Target                                            | sgRNA                 | TIDE Primer Forward     | TIDE Primer Reverse         |
| <i>Pdcd1</i>                                           |                       |                         |                             |
| <i>Pdcd1-1</i>                                         | GGTACCCTGGTCATTCACCT  | CCCCACCTCTAGTTGCCTGTT   | GGCATTTCACCTGTAAAACCCAC     |
| <i>Pdcd1-2</i>                                         | ACAGCCCAAGTGAATGACCA  | CACCTCTAGTTGCCTGTTCTCCC | GGGGTGGATTTTGAGCCCCA        |
| <i>Pdcd1-3</i>                                         | GACACACGGCGCAATGACAG  | GTACAGGCTCCTTCTCACAGC   | TCCATCCCTTAAAGGTAAATGGGCATC |
| <i>Batf</i>                                            |                       |                         |                             |
| <i>Batf-1</i>                                          | AGAGATCAAACAGCTCACCG  | ATAGACAGCAATCAGCAGTTGCC | AAGGGATCACGGGAGTAGCAT       |
| <i>Batf-2</i>                                          | GTGGGTACTCACCAGGTGAA  | AGGAGACCCAAGGGTGGGTA    | TACATGCATGGGAGAGCGAAG       |
| <i>Batf-3</i>                                          | TGTGAAGTACTTGAGCTCCT  | ATAGACAGCAATCAGCAGTTGCC | AAGGGATCACGGGAGTAGCATC      |
| <i>Ptpn2</i>                                           |                       |                         |                             |
| <i>Ptpn2-1</i>                                         | GAATATGAGAAAAGTATCGAA | GGGCACTGAGCAGCAAACCTTAT | GTGACTAGCTTTTCATCTTTGCCTCTT |
| <i>Ptpn2-2</i>                                         | CTCACTTCCATTATACCACC  | CTGGAAGGCTGGCTGTAGTGTT  | CTAACCTCCTCAGGCACCAGTC      |
| <i>Ly75</i>                                            |                       |                         |                             |
| <i>Ly75-1</i>                                          | GTCACGAAACTCCATAATGG  |                         |                             |
| <i>Ly75-2</i>                                          | GCTTGCTTGAGAAAACGTAA  |                         |                             |
| <i>Ms4a1</i>                                           |                       |                         |                             |
| <i>Ms4a1-1</i>                                         | GTCACGAAACTCCATAATGG  |                         |                             |
| <i>Ms4a1-2</i>                                         | GCTTGCTTGAGAAAACGTAA  |                         |                             |
| <i>Fcgr1</i>                                           |                       |                         |                             |
| <i>Fcgr1-1</i>                                         | AGAGTACCATATAGCAAGGG  |                         |                             |
| <i>Fcgr1-2</i>                                         | TGGGATGCTATAACTAGGCG  |                         |                             |
| Control                                                |                       |                         |                             |
| Control-1                                              | GCGAGGTATTCCGGCTCCGCG |                         |                             |
| Control-2                                              | GCTTTCACGGAGGTTCCGACG |                         |                             |

| 110 sgRNA Screen  |                        |
|-------------------|------------------------|
| <i>Entpd1-1</i>   | GTGGATGAAGTCATCACTGAG  |
| <i>Entpd1-2</i>   | GAGCTATCACAGCCAAGATAG  |
| <i>Entpd1-3</i>   | GCCAACCTGTACATCTACAAG  |
| <i>Entpd1-4</i>   | GCTTGGATGTTGGTATCAGTT  |
| <i>Adora2a-1</i>  | GTGTCGATGGCAATAGCCAAG  |
| <i>Adora2a-2</i>  | GCTCCACAAAGACCTGCGGCG  |
| <i>Adora2a-3</i>  | GGAGAGCCAACCCCTACCAG   |
| <i>Adora2a-4</i>  | GAAGCAGTTGATGATGTGCAG  |
| <i>Kdr-1</i>      | GTTACCCGCTTAACGGTCCGT  |
| <i>Kdr-2</i>      | GATACGTTTGAGAACCTCACG  |
| <i>Kdr-3</i>      | GTTGTAAGAATGGAGACACG   |
| <i>Kdr-4</i>      | GTCGGACTTGACTGCCCACTG  |
| <i>Ilfnr1-1</i>   | GTATGTGGAGCATAACCGGAG  |
| <i>Ilfnr1-2</i>   | GGTATCCCAGCATAACGACA   |
| <i>Ilfnr1-3</i>   | GTTCAAGGTGAAATACGAGGA  |
| <i>Ilfnr1-4</i>   | GTATACCAATACGCAAATACC  |
| <i>Tnfrsf1a-1</i> | GAGTTGCAAGACATGTCGGAA  |
| <i>Tnfrsf1a-2</i> | GAGACCTAGCAAGATAACCAG  |
| <i>Tnfrsf1a-3</i> | GATGGGGATACATCCATCAG   |
| <i>Tnfrsf1a-4</i> | GGATCCCGTGCCCTGTCAAAG  |
| <i>Il1r1-1</i>    | GAGCATAACAATTGTAGCCGTG |
| <i>Il1r1-2</i>    | GCAGCAAGACCCCATATCAG   |
| <i>Il1r1-3</i>    | GCGTATGTCCTATACGTTCCG  |
| <i>Il1r1-4</i>    | GACTGTGTTAGAGAATGACCC  |
| <i>Socs3-1</i>    | GTTGAGTACACAGTCGAAGCG  |
| <i>Socs3-2</i>    | GTGAGCGTCAAGACCCAGTCG  |
| <i>Socs3-3</i>    | GACTTCGGACGAGGGTTCCGT  |
| <i>Socs3-4</i>    | GCGGATAAGAAAGGTGCCCGC  |
| <i>Ptpn2-1</i>    | GAAGAAGTTACATCTTAACAC  |
| <i>Ptpn2-2</i>    | GAATATGAGAAAAGTATCGAA  |
| <i>Ptpn2-3</i>    | GCACTCTATGAGGATAGTCAT  |
| <i>Ptpn2-4</i>    | GTGCAGTGATCCATTGCAGTG  |
| <i>Rnf128-1</i>   | GATAATTACGGCAGCAACCGT  |
| <i>Rnf128-2</i>   | GCAACTACACCAAGACTGAA   |
| <i>Rnf128-3</i>   | GTCACAATGGTCATCGAAGTA  |
| <i>Rnf128-4</i>   | GGGCAACCAGACGATACAGA   |
| <i>Cpt1a-1</i>    | GCACATTGTCGTGTACCACAG  |
| <i>Cpt1a-2</i>    | GCATACTGCTGTATCGTCGCA  |
| <i>Cpt1a-3</i>    | GAGGAATACATCTACCTGCG   |

|                  |                        |
|------------------|------------------------|
| <i>Cpt1a-4</i>   | GACGTTGGACGAATCGGAACA  |
| <i>Hk2-1</i>     | GATTCCCGAGGACATCATGCG  |
| <i>Hk2-2</i>     | GGAGATGCGTCACATTGACA   |
| <i>Hk2-3</i>     | GATCCGGAGTTGACCTCACAA  |
| <i>Hk2-4</i>     | GAAGGCCATCCAGCGCAGAG   |
| <i>Dlat-1</i>    | GACTACCGCAACGGACCGCAG  |
| <i>Dlat-2</i>    | GCAGGCTCTCAAACCCAACAG  |
| <i>Dlat-3</i>    | GCGACAAGGCCACCATAGGTG  |
| <i>Dlat-4</i>    | GTTCAGAACCACACCTACCGG  |
| <i>Prkab2-1</i>  | GTTCAGACCAGCGGATAACGG  |
| <i>Prkab2-2</i>  | GTACAAACTCTTTGTCCCCG   |
| <i>Prkab2-3</i>  | GTCCTCACCTCTTTATCAGA   |
| <i>Prkab2-4</i>  | GAGGAGCACAAAGATCATGGTG |
| <i>Lag3-1</i>    | GATCCTAACTTTCTACGAAG   |
| <i>Lag3-2</i>    | GAGAGAAGTCCCCGCGCTGG   |
| <i>Lag3-3</i>    | GTCAGCAGCGTACACTGTCAG  |
| <i>Lag3-4</i>    | GGGTGCGGGTTGTCTAGGCG   |
| <i>Havcr2-1</i>  | GTTACACTCTATCTACACCT   |
| <i>Havcr2-2</i>  | GTTTCTCCAAGAACCCTAACCA |
| <i>Havcr2-3</i>  | GCTAAAGGGCGATCTCAACAA  |
| <i>Havcr2-4</i>  | GATCAGTTCTGAGCAACTCGT  |
| <i>Cd28-1</i>    | GTCGGCATTTCGAGCGAAACTG |
| <i>Cd28-2</i>    | GCTTGTGGTAGATAGCAACG   |
| <i>Cd28-3</i>    | GCAAGGGCGTGAACAGCGACG  |
| <i>Cd28-4</i>    | GTTCTACAACCTTCTCGCAA   |
| <i>Tnfrsf9-1</i> | GTGCATACGTAATTCGTCCA   |
| <i>Tnfrsf9-2</i> | GCCAAGTACCTTCTCCAGCAT  |
| <i>Tnfrsf9-3</i> | GTTGCTCCTCTACCCACAACG  |
| <i>Tnfrsf9-4</i> | GACCAGGCTGACAGTTATCAC  |
| <i>Zap70-1</i>   | GAAGCGAGAGAATCTCCTCG   |
| <i>Zap70-2</i>   | GTCGACAACCCCTACATCGTG  |
| <i>Zap70-3</i>   | GGAGATCCCTGTGAGCAATG   |
| <i>Zap70-4</i>   | GTCTGGCGCGTACCACTTCAG  |
| <i>Pdcd1-1</i>   | GCAATACAGGGATACCCACTA  |
| <i>Pdcd1-2</i>   | GACACACGGCGCAATGACAG   |
| <i>Pdcd1-3</i>   | GCACCCCAAGGCAAAAATCG   |
| <i>Pdcd1-4</i>   | GCAGCTTGTCCAACCTGGTCGG |
| <i>Dgkz-1</i>    | GACCCAGTGGTGTCTTACGA   |
| <i>Dgkz-2</i>    | GATGGAGCCACTGACCGGGT   |
| <i>Dgkz-3</i>    | GAGCACATCCGAGTAGTGGTG  |
| <i>Dgkz-4</i>    | GC AAGTCTTTGATCTGAGCCA |
| <i>Tigit-1</i>   | GCCTATCATACTGATCCTGGT  |
| <i>Tigit-2</i>   | GCAGGCACGATAGATACAAAG  |
| <i>Tigit-3</i>   | GTCTCTGACAATGAATGACA   |
| <i>Tigit-4</i>   | GAGCCATGGTTCCTCCAAGCG  |
| <i>Olf5-1</i>    | GTGGGTCATACAAGCTATGAA  |
| <i>Olf5-2</i>    | GACATGACAGGTTGAGTAATG  |
| <i>Olf5-3</i>    | GTACACTACCCAGTACTCATG  |
| <i>Olf8-1</i>    | GTACAAGATTCATTATGAGG   |
| <i>Olf8-2</i>    | GAAGTACATGGGTGTGTGCAG  |
| <i>Olf8-3</i>    | GATGTAGGATGCTAACAACCC  |
| BRDN0000737505   | GAAAAAGTCCGCGATTACGTC  |
| BRDN0000737693   | GAAAACGGCTCGATCGGTGAT  |
| BRDN0000737637   | GAAAACGTAATTATACCGAGC  |
| BRDN0000738185   | GAAAATTGCACCTTCCCGGCC  |
| BRDN0000737801   | GAAACCCCGCGCGGAGCGTC   |
| BRDN0000737467   | GAAACCTAGCGTAGATTCGGC  |
| BRDN0000737848   | GAAACGAGGCTGTTGACAC    |
| BRDN0000737609   | GAAACTCATACTGAGCGAATC  |
| BRDN0000737434   | GAAACTCCCGTGTCAACCGAT  |
| BRDN0000738254   | GAAAGACGTGCATTCAGCGAG  |
| BRDN0000737777   | GAACATGTTAAGTCGCGTTAT  |
| BRDN0000737611   | GAACCAGCATTGACCGCGCT   |
| BRDN0000737528   | GAACCCGGCTGTCATCGCCG   |
| BRDN0000738228   | GAACCCGCCGGAACAATCAGC  |
| BRDN0000737727   | GAACCGGCTGCGGTTTGCAA   |
| BRDN0000737483   | GAACCGTACTGCGAGGAGCAT  |
| BRDN0000737872   | GAACCTCGTCTCATGTACGAA  |
| BRDN0000737516   | GAACGCCCGGATTTGCTTGA   |
| BRDN0000737844   | GAACGGCTGCGCCCGCGCAA   |
| BRDN0000737412   | GAACGGGCGCAATACCTTTT   |

\*BRDN = Broad GPP Non-targeting control sgRNAs
